# Supplementary material for: Epidemiological Characterization of Dengue Virus Serotypes in Mexico: Implications for Disease Severity
Source: Preprints.org preprint supplement (doi:10.20944/preprints202403.0992.v1), 2024-03-18
Supplement: Supplementary file 1 [file supplementary]

## Sheet: Table 1
	Table 1.
	SEROTYPE	FEMALE		MALE
		N	%	N	%	p
	DNV-1	548	10.0018	569	11.2651	0.038
	DNV-2	1279	23.3437	1057	20.9265	0.003
	DNV-3	3465	63.2415	3262	64.5813	0.158
	DNV-4	147	2.68297	124	2.45496	0.498
	coinfection DNV- 1 and DNV-2	5	0.0912575	10	0.197981	0.233
	coinfection DNV-1 and DNV-3	8	0.146012	4	0.0791922	0.467
	coinfection DNV-2 and DNV-3	23	0.419785	18	0.356365	0.714
	coinfection DNV-2 and DNV-4	2	0.036503	5	0.0989903	0.387
	coinfection DNV-3 and DNV-4	2	0.036503	2	0.0395961	1
	Total	5479	100	5051	100

## Sheet: Table 2
	Table 2.
	Serotype	Ambulatory		Hospitalized		Death
		N	%	N	%	N	%
	DNV-1	724	10.8856	393	10.1708	0	0
	DNV-2	1280	19.2452	1051	27.1998	5	33.3333
	DNV-3	4403	66.2006	2314	59.8861	10	66.6667
	DNV-4	196	2.94693	75	1.94099	0	0
	coinfection DNV- 1 and DNV-2	12	0.180424	3	0.0776398	0	0
	coinfection DNV-1 and DNV-3	7	0.105247	5	0.1294	0	0
	coinfection DNV-2 and DNV-3	24	0.360848	17	0.439959	0	0
	coinfection DNV-2 and DNV-4	2	0.0300707	5	0.1294	0	0
	coinfection DNV-3 and DNV-4	3	0.045106	1	0.0258799	0	0
	Total	6651	100	3864	100	15	100
														63.1624

## Sheet: Table 3
	Table 3.
	Hospitalized	B	Standard error	Wald	gl	Sig.	Exp(B)	95%CI EXP(B)
								Inferior	Superior
	Sex (Male)	-0.208845	0.041993	24.7339	1	6.58158e-07	0.811521	0.747404	0.881139
	Serotype			67.6395	3	1.36644e-14
	DNV-1	0.404812	0.15367	6.93948	1	0.00843135	1.49902	1.10918	2.02587
	DNV-2	0.743067	0.144686	26.3756	1	2.81072e-07	2.10237	1.58326	2.79169
	DNV-3	0.361807	0.14096	6.58815	1	0.010266	1.43592	1.0893	1.89285
	Region by climate			42.8973	2	4.84131e-10
	Temperate humid and subhumid climate			109.703	3	1.27138e-23
	Warm humid and subhumid climate	0.514699	0.121045	18.0806	1	2.1175e-05	1.67313	1.31977	2.12112
	Trimester of onset of signs and symptoms			109.703	3	1.27138e-23
	Trimester of onset of signs and symptoms (April to June)	0.514699	0.121045	18.0806	1	2.1175e-05	1.67313	1.31977	2.12112
	Trimester of onset of signs and symptoms (July to September)	0.912177	0.0924394	97.3742	1	5.73896e-23	2.48974	2.07715	2.98427
	Trimester of onset of signs and symptoms (October to December)	0.825792	0.0927714	79.2343	1	5.51643e-19	2.28369	1.90401	2.73908
	Constant	-1.7277	0.214263	65.0192	1	7.41729e-16	0.177693
	Severe dengue	B	Standard error	Wald	gl	Sig.	Exp(B)	95%CI EXP(B)
								Inferior	Superior
	Sex (Male)	-0.0883199	0.0405897	4.73462	1	0.0295614	0.915468	0.84546	0.991273
	Serotype			20.4924	3	0.00013418
	DNV-1	0.493633	0.145393	11.5272	1	0.000685858	1.63826	1.23204	2.17841
	DNV-2	0.522635	0.136991	14.555	1	0.000136128	1.68647	1.28935	2.20589
	DNV-3	0.374489	0.132937	7.93577	1	0.00484669	1.45425	1.12068	1.8871
	Region by climate			46.1695	2	9.42794e-11
	Temperate humid and subhumid climate	0.919055	0.151733	36.6877	1	1.38652e-09	2.50692	1.86202	3.37517
	Warm humid and subhumid climate	0.598865	0.0983421	37.0834	1	1.13186e-09	1.82005	1.50098	2.20695
	Trimester of onset of signs and symptoms			115.32	3	7.85617e-25
	Trimester of onset of signs and symptoms (April to June)	0.434712	0.112545	14.9193	1	0.000112209	1.54452	1.23878	1.92571
	Trimester of onset of signs and symptoms (July to September)	0.852606	0.0843429	102.188	1	5.04941e-24	2.34575	1.98833	2.76742
	Trimester of onset of signs and symptoms (October to December)	0.725716	0.0845849	73.6119	1	9.50918e-18	2.06621	1.75055	2.43878
	Constant	-1.40264	0.202284	48.0802	1	4.0913e-12	0.245947

## Sheet: Table 4
	Table 4.
	Variable	OR	95%CI	p
	Gestation weeks 30 to 40	4.65	2.74 a 7.88	<0.001
	Veracruz	4.11	2.64 a 6.42	<0.001
	Male	0.94	0.60 a 1.47	0.821
	Pregnancy	1.53	0.47 a 5.00	0.452
	DNV-1	4.33	2.71 a 6.93	<0.001
	DNV-2	13.67	7.88 a 23.72	<0.001
	DNV-3	1.43	0.87 a 2.34	<0.001
	DNV-4	6.07	3.17 a 11.60	<0.001
	p: corrected chi square.

## Sheet: Table 5
	Table 5.
	Serotype		B	Standard error	Wald	gl	Sig.	Exp(B)	95% CI Exp(B)
									Inf	Sup
	DNV-1	Intersection	0.690433	0.299432	5.31677	1	0.0211211
		Female	0.187999	0.136541	1.89575	1	0.168555	1.20683	0.92347	1.57714
		Male	0b			0
		<1 year	0.298109	1.19149	0.0625993	1	0.802434	1.34731	0.130398	13.9208
		1 to 5 years	1.45718	0.520022	7.852	1	0.00507645	4.29382	1.54953	11.8984
		6 to 18 years	0.949033	0.317839	8.91554	1	0.00282755	2.58321	1.38553	4.81621
		19 to 40 years	0.49675	0.31085	2.55373	1	0.110034	1.64337	0.893593	3.02226
		41 to 60 years	0.348977	0.336013	1.07865	1	0.299	1.41762	0.733743	2.73888
		61 year and more	0b			0
	DNV-2	Intersection	2.53161	0.258402	95.9846	1	1.15783e-22
		Female	-0.00802753	0.129419	0.00384742	1	0.950541	0.992005	0.769755	1.27842
		Male	0b			0
		<1 year	0.245487	1.06126	0.0535074	1	0.817069	1.27824	0.159687	10.2319
		1 to 5 years	-0.209019	0.496568	0.17718	1	0.673808	0.81138	0.306581	2.14735
		6 to 18 years	-0.449714	0.279314	2.59231	1	0.107384	0.637811	0.368926	1.10267
		19 to 40 years	-0.460322	0.270158	2.90327	1	0.0884002	0.63108	0.371643	1.07163
		41 to 60 years	-0.24825	0.293283	0.716482	1	0.3973	0.780165	0.43908	1.38621
		61 years and more	0b			0
	DNV-3	Intersection	2.60825	0.256933	103.052	1	3.26441e-24
		Female	0.104614	0.124939	0.701098	1	0.402415	1.11028	0.86913	1.41834
		Male	0b			0
		<1 year	0.732759	1.04718	0.489647	1	0.484085	2.08081	0.267224	16.2028
		1 to 5 years	0.700725	0.485234	2.08542	1	0.148711	2.01521	0.778555	5.21618
		6 to 18 years	0.709976	0.276204	6.60734	1	0.0101559	2.03394	1.18368	3.49497
		19 to 40 years	0.565992	0.267772	4.46778	1	0.0345399	1.76119	1.04203	2.9767
		41 to 60 years	0.383628	0.290429	1.74478	1	0.186535	1.4676	0.830603	2.59311
		61 years and more	0b			0
	a. The reference category is: Serotype 4.
	b. This parameter is set to zero because it is redundant.

## Sheet: A1
	A1. Distribution of dengue samples by serotypes and co-infections.
	Serotype	Total
		N	%
	DNV-1	1117	10.6078
	DNV-2	2336	22.1842
	DNV-3	6727	63.8841
	DNV-4	271	2.5736
	coinfection DNV- 1 and DNV-2	15	0.14245
	coinfection DNV-1 and DNV-3	12	0.11396
	coinfection DNV-2 and DNV-3	41	0.389364
	coinfection DNV-2 and DNV-4	7	0.0664767
	coinfection DNV-3 and DNV-4	4	0.0379867
	Total	10530	100

## Sheet: A2
	A2. Distribution of dengue samples by serotype and coinfection by clinical classification.
	Serotype	non-severe dengue		dengue with warning signs		severe dengue		Total
		N	%	N	%	N	%	N*	%
	DNV-1	623	10.4513	460	10.604	33	14.9321	1116	10.6084
	DNV-2	1223	20.5167	1070	24.6657	40	18.0995	2333	22.1768
	DNV-3	3899	65.4085	2685	61.8949	138	62.4434	6722	63.8973
	DNV-4	177	2.9693	85	1.95943	8	3.61991	270	2.56654
	coinfection DNV- 1 and DNV-2	10	0.167757	5	0.11526	0	0	15	0.142586
	coinfection DNV-1 and DNV-3	4	0.0671028	6	0.138313	2	0.904977	12	0.114068
	coinfection DNV-2 and DNV-3	18	0.301963	23	0.530198	0	0	41	0.389734
	coinfection DNV-2 and DNV-4	4	0.0671028	3	0.0691563	0	0	7	0.0665399
	coinfection DNV-3 and DNV-4	3	0.0503271	1	0.0230521	0	0	4	0.0380228
	Total	5961	100	4338	100	221	100	10520	100
	*10 records with omission of classification.

## Sheet: A3
A3. Serotype and coinfection by State.
Estate	DNV-1		DNV-2		DNV-3		DNV-4		coinfection DNV-1 and DNV-2		coinfection DNV-1 and DNV-3		coinfection DNV-2 and DNV-3		coinfection DNV-2 and DNV-4		coinfection DNV-3 and DNV-4		Total
	N	%	N	%	N	%	N	%	N	%	N	%	N	%	N	%	N	%	N	%
AGUASCALIENTES	55	4.9239	1	0.0428082	6	0.0891928	0	0	0	0	0	0	0	0	0	0	0	0	62	0.588794
BAJA CALIFORNIA	0	0	0	0	1	0.0148655	0	0	0	0	0	0	0	0	0	0	0	0	1	0.00949668
BAJA CALIFORNIA SUR	88	7.87825	3	0.128425	36	0.535157	2	0.738007	1	6.66667	0	0	0	0	0	0	0	0	130	1.23457
CAMPECHE	1	0.0895255	4	0.171233	429	6.37729	0	0	0	0	0	0	0	0	0	0	0	0	434	4.12156
CDMX	14	1.25336	12	0.513699	27	0.401368	2	0.738007	0	0	0	0	1	2.43902	0	0	0	0	56	0.531814
CHIAPAS	29	2.59624	2	0.0856164	27	0.401368	9	3.32103	0	0	1	8.33333	0	0	0	0	0	0	68	0.645774
COAHUILA	2	0.179051	1	0.0428082	10	0.148655	4	1.47601	0	0	0	0	0	0	0	0	0	0	17	0.161443
COLIMA	107	9.57923	56	2.39726	59	0.877063	0	0	0	0	0	0	0	0	0	0	0	0	222	2.10826
DURANGO	0	0	0	0	5	0.0743273	0	0	0	0	0	0	0	0	0	0	0	0	5	0.0474834
GUANAJUATO	34	3.04387	15	0.642123	264	3.92448	0	0	0	0	0	0	0	0	0	0	0	0	313	2.97246
GUERRERO	170	15.2193	136	5.82192	300	4.45964	2	0.738007	0	0	0	0	1	2.43902	0	0	0	0	609	5.78348
HIDALGO	0	0	2	0.0856164	4	0.0594619	0	0	0	0	0	0	0	0	0	0	0	0	6	0.0569801
JALISCO	141	12.6231	52	2.22603	87	1.2933	0	0	0	0	0	0	0	0	0	0	0	0	280	2.65907
MEXICO	3	0.268577	9	0.385274	13	0.193251	2	0.738007	0	0	0	0	0	0	0	0	0	0	27	0.25641
MICHOACAN	50	4.47628	150	6.42123	60	0.891928	0	0	0	0	0	0	0	0	0	0	0	0	260	2.46914
MORELOS	60	5.37153	96	4.10959	431	6.40702	9	3.32103	4	26.6667	4	33.3333	10	24.3902	0	0	0	0	614	5.83096
NAYARIT	31	2.77529	17	0.72774	23	0.341906	3	1.10701	0	0	0	0	0	0	0	0	0	0	74	0.702754
NUEVO LEON	4	0.358102	3	0.128425	10	0.148655	3	1.10701	0	0	0	0	0	0	0	0	0	0	20	0.189934
OAXACA	56	5.01343	422	18.0651	123	1.82845	11	4.05904	4	26.6667	1	8.33333	3	7.31707	1	14.2857	0	0	621	5.89744
PUEBLA	89	7.96777	95	4.06678	21	0.312175	5	1.84502	0	0	1	8.33333	0	0	1	14.2857	2	50	214	2.03229
QUERETARO	1	0.0895255	4	0.171233	3	0.0445964	0	0	0	0	0	0	0	0	0	0	0	0	8	0.0759734
QUINTANA ROO	44	3.93912	14	0.599315	1702	25.301	17	6.27306	0	0	1	8.33333	0	0	0	0	0	0	1778	16.8851
SAN LUIS POTOSI	3	0.268577	4	0.171233	2	0.0297309	0	0	0	0	0	0	0	0	0	0	0	0	9	0.0854701
SINALOA	5	0.447628	7	0.299658	14	0.208117	0	0	0	0	0	0	0	0	0	0	0	0	26	0.246914
SONORA	0	0	5	0.214041	2	0.0297309	0	0	0	0	0	0	0	0	0	0	0	0	7	0.0664767
TABASCO	4	0.358102	10	0.428082	232	3.44879	9	3.32103	0	0	0	0	0	0	0	0	0	0	255	2.42165
TAMAULIPAS	14	1.25336	2	0.0856164	13	0.193251	5	1.84502	0	0	0	0	0	0	0	0	0	0	34	0.322887
TLAXCALA	0	0	0	0	0	0	0	0	1	6.66667	0	0	0	0	0	0	0	0	1	0.00949668
VERACRUZ	35	3.13339	1207	51.6695	492	7.31381	186	68.6347	5	33.3333	1	8.33333	25	60.9756	5	71.4286	2	50	1958	18.5945
YUCATAN	77	6.89346	7	0.299658	2331	34.6514	2	0.738007	0	0	3	25	1	2.43902	0	0	0	0	2421	22.9915
Total	1117	100	2336	100	6727	100	271	100	15	100	12	100	41	100	7	100	4	100	10530	100

## Sheet: A4
	A4. Distribution of age summary measures by dengue serotype and co-infection.
	Variable	N	Median	Min	Max	p
	Serotype
	DNV-1	1117	21	0	87
	DNV-2	2336	30	0	95
	DNV-3	6727	24	0	92
	DNV-4	271	27	0	89
	coinfection DNV- 1 and DNV-2	15	35	5	67	<0.001
	coinfection DNV-1 and DNV-3	12	27.5	6	43
	coinfection DNV-2 and DNV-3	41	24	0	62
	coinfection DNV-2 and DNV-4	7	35	9	66
	coinfection DNV-3 and DNV-4	4	11.5	0	49
	Type of patient
	Ambulatory	6651	26	0	92
	Hospitalized	3864	21	0	95	<0.001
	Death	15	29	0	87
	p: Test Kruskal Wallis

## Sheet: A5
	A5. Bivariate analysis based on the Ct value for selected variables.
	VARIABLE	Obs	Median	Min	Max	P
	Age group
	<1	52	25.72	12.15	39.36
	1 to 4	174	26.65	12.3	38.09
	5 to 14	2534	27.055	12.48	3200
	15 to 24	2466	26.75	12.38	321.16	<0.001
	25 to 44	3529	25.73	3.94	39.83
	45 to 64	1414	25.815	10.08	1500
	65 and more	349	27.22	10.88	36.9
	Sex
	Female	5472	26.44	7.61	1500
	Male	5046	26.46	3.94	3200	0.532
	Pregnant
	Yes	276	23.895	7.61	36.43
	No	5196	26.565	10.08	1500	<0.001
	Serotype
	DNV-1	1112	26.745	12.63	3200
	DNV-2	2334	26.6	12.18	39.83	0.338
	DNV-3	6722	26.35	3.94	1500
	DNV-4	271	25.97	14.44	37.31
	Clinical classification
	Non severe dengue	5957	24.49	7.61	1500
	Dengue with warning signs	4330	28.35	3.94	3200	<0.001
	Severe dengue	221	28.52	10.88	39.36
	Missing	10	27.785	15.41	35.25
	Type of patient
	Ambulatory	6644	24.95	7.61	1500
	Hospitalized	3859	28.3	3.94	3200	<0.001
	Death	15	28.8	18.07	39.36
	p: Test Kruskal Wallis.

[truncated: 2 more sheets: A6, A7]
